# Supplementary material for: Reconstructing the regulatory programs underlying the phenotypic plasticity of neural cancers
Source: PubMed Central journal article supplement (PMC11549355; doi:10.1038/s41467-024-53954-3), 2024-11-09
Supplement: 41467_2024_53954_MOESM3_ESM.pdf [file 41467_2024_53954_MOESM3_ESM.pdf]

## Description of Additional Supplementary Files

**Supplementary Data 1:** Human Protein Atlas annotation of non-overlapping regulators between scregclust and SCENIC+, related to Figs. 1D-E.

**Supplementary Data 2:** Regulator x meta-program analysis.

**Supplementary Data 3:** Hyperparameters used for all scregclust runs in the main manuscript.
